# Supplementary material for: Safety Profile of a Virus-Like Particle-Based Vaccine Targeting Self-Protein Interleukin-5 in Horses
Source: PubMed Central journal article supplement (PMC7349629; doi:10.3390/vaccines8020213), 2020-05-09
Supplement: vaccines-08-00213-s001.pdf [file vaccines-08-00213-s001.pdf]

**Supplementary Materials:**
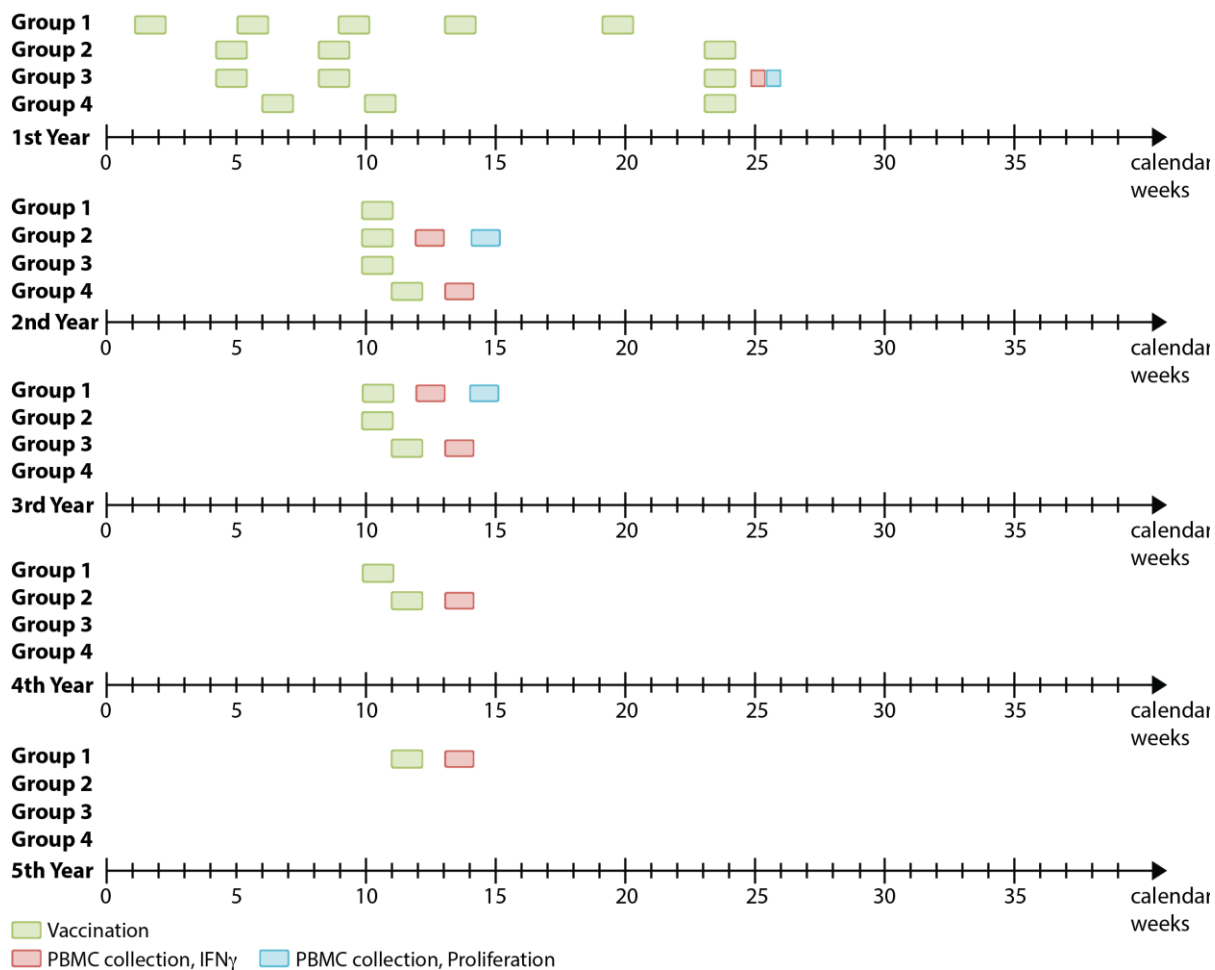

**Figure 1. Vaccination regimen.** The horses (group 1, 2, 3, 4) were vaccinated (green box) in the first treatment year (1<sup>st</sup> Year) by a basic vaccination regimen and received a single booster in all follow-up years (2<sup>nd</sup>, 3<sup>rd</sup>, 4<sup>th</sup>, 5<sup>th</sup> year) in spring before the *Culicoides* season started. Bleedings for IFN $\gamma$  (red box) and for proliferation (blue box) occurred two or respectively four weeks post boost.

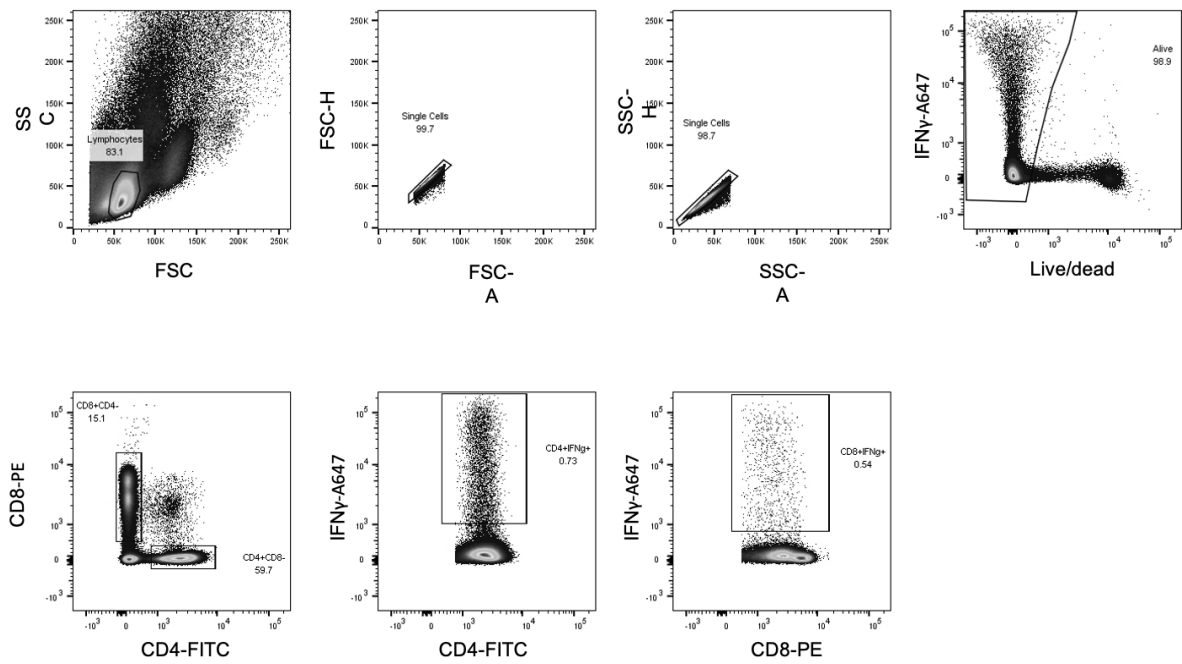

Figure 2. Gating strategy for IFN $\gamma$  production of CD4<sup>+</sup> and CD8<sup>+</sup> T cells.

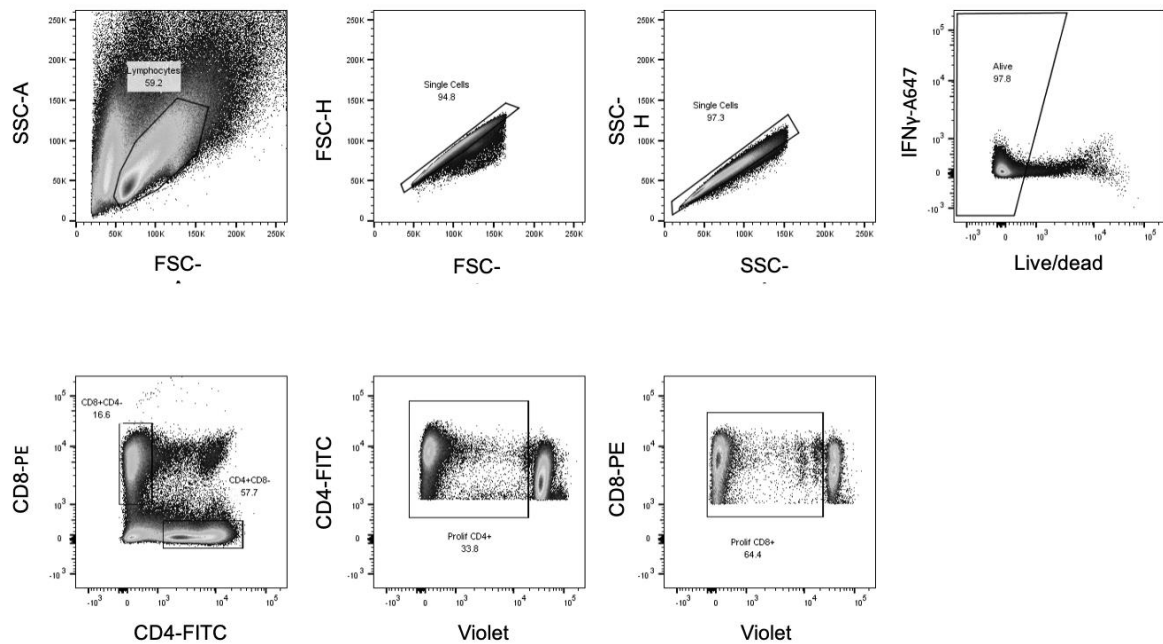

Figure 3. Gating strategy for proliferation of CD4<sup>+</sup> and CD8<sup>+</sup> T cells.

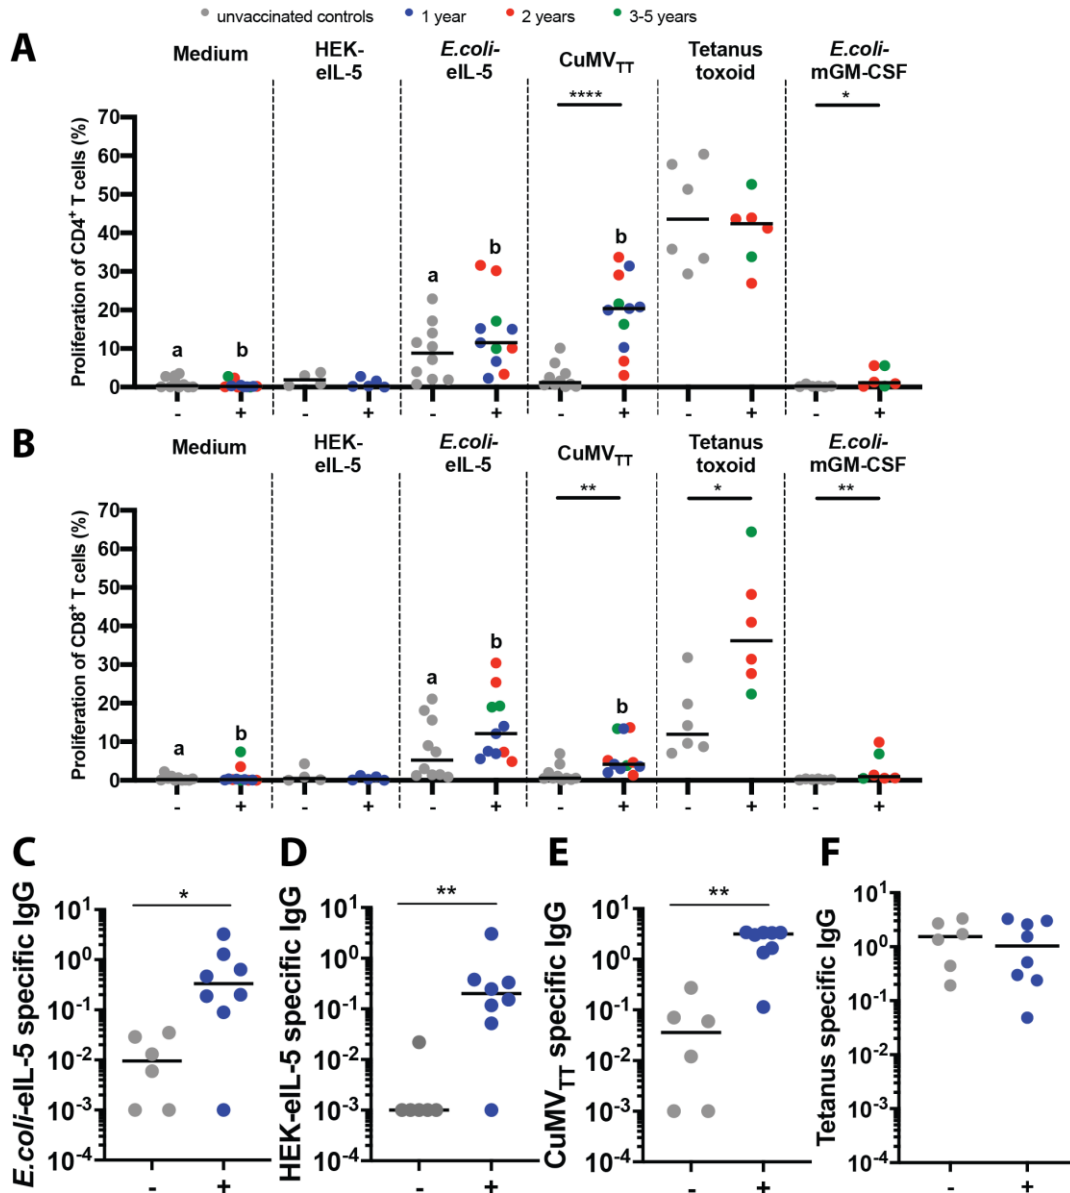

**Figure 4.** No auto-proliferative CD4<sup>+</sup> and CD8<sup>+</sup> T cells upon *in-vitro* re-stimulation of PBMCs, but specific IgGs upon resiquimod stimulated PBMCs. (A, B) Proliferation of CD4<sup>+</sup> (A) and CD8<sup>+</sup> (B) T cells upon *in-vitro* re-stimulation using medium control, HEK-eIL-5, *E.coli*-eIL-5, CuMV<sub>TT</sub>, tetanus toxoid (TetaTox), or *E.coli*-mGM-CSF of PBMCs from unvaccinated (-) control horses (grey), first (blue), second (red), or third + (green) year vaccinated (+) horses. Values show individual horses and median. Differences between unvaccinated (-) controls and vaccinated (+) horses were analyzed with Mann-Whitney U test. Medium unstimulated cells were compared to stimulated cells by Wilcoxon matched-pairs rank with Bonferroni correction, significant differences between unstimulated and stimulated cells within groups indicated with a for controls and b for vaccinated horses. (C, D, E, F) Total IgG by resiquimod stimulated PBMCs from unvaccinated (-) and vaccinated (+) horses against *E.coli*-eIL-5 (C), HEK-eIL-5 (D), CuMV<sub>TT</sub> (E), tetanus toxoid (F) by ELISA. Values of individual horses with median on a log scale, statistical analysis by Mann-Whitney U test.

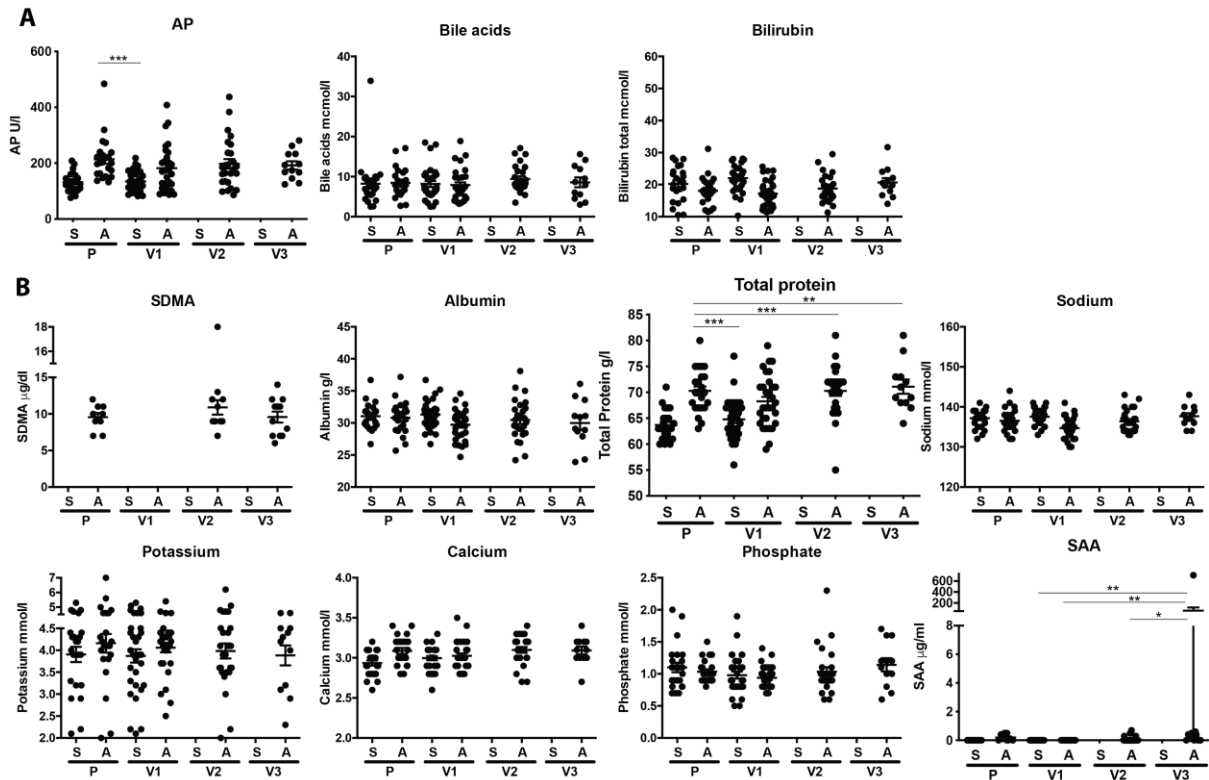

**Figure 5. Additional liver and kidney parameters.** Liver (A) and kidney (B) parameters were measured in the spring (S) and autumn (A) in the placebo year and 1<sup>st</sup> (V1), 2<sup>nd</sup> (V2) and 3<sup>rd</sup> (V3) treatment year. AP, alkaline phosphatase, SDMA, symmetric dimethylarginine, SAA, serum amyloid alpha. Values of individual horses with mean and SEM, statistical analysis by Kruskal-Wallis with Dunn’s multiple comparison, statistical significance is only indicated when at least one value was outside of norm.

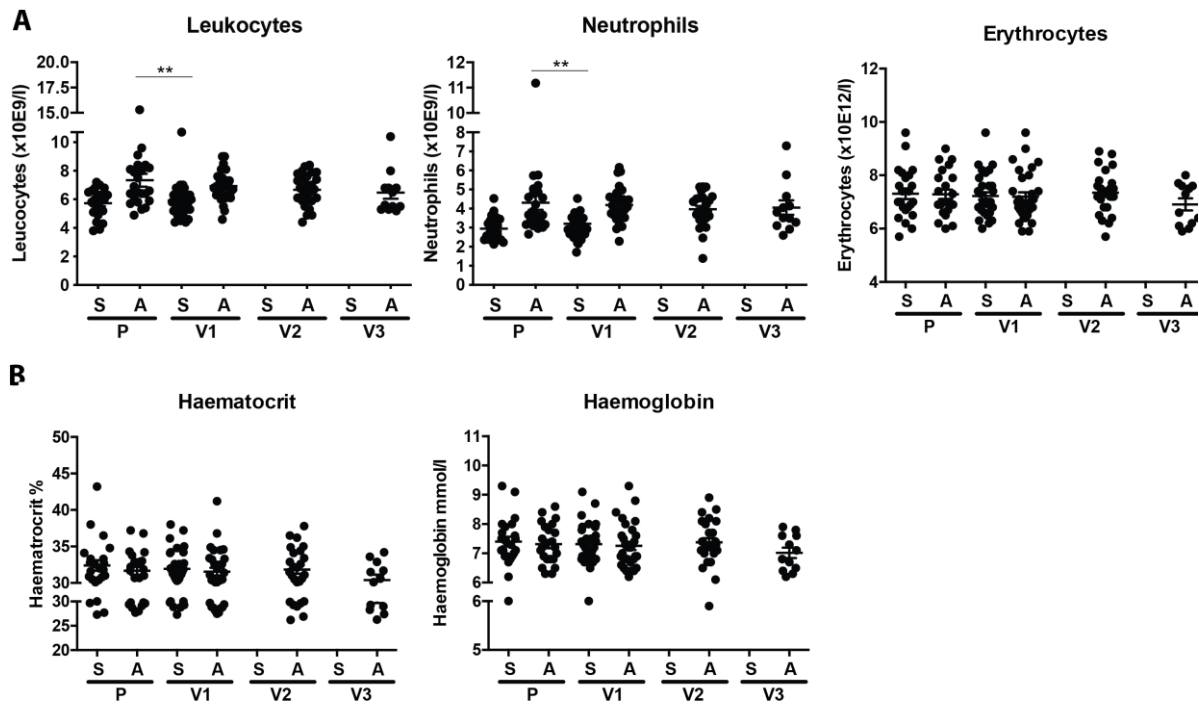

**Figure 6. Blood differential count and hematology.** Blood differential count (A) as well as analysis of hematocrit and hemoglobin concentration (B) was carried out in the spring (S) and autumn (A) in the placebo year and 1<sup>st</sup> (V1), 2<sup>nd</sup> (V2) and 3<sup>rd</sup> (V3) treatment year. Values of individual horses with mean and SEM, statistical analysis by Kruskal-Wallis with Dunn’s multiple comparison, statistical significance is only indicated when at least one value was outside of norm.

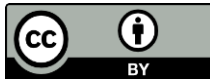

© 2020 by the authors. Submitted for possible open access publication under the terms and conditions of the Creative Commons Attribution (CC BY) license (<http://creativecommons.org/licenses/by/4.0/>).
